# Supplementary material
Source: Springer Nature journal article supplement (https://www.springermedizin.de/resource/supplementary/12955_2011_956_MOESM2_ESM.pdf/9558824)

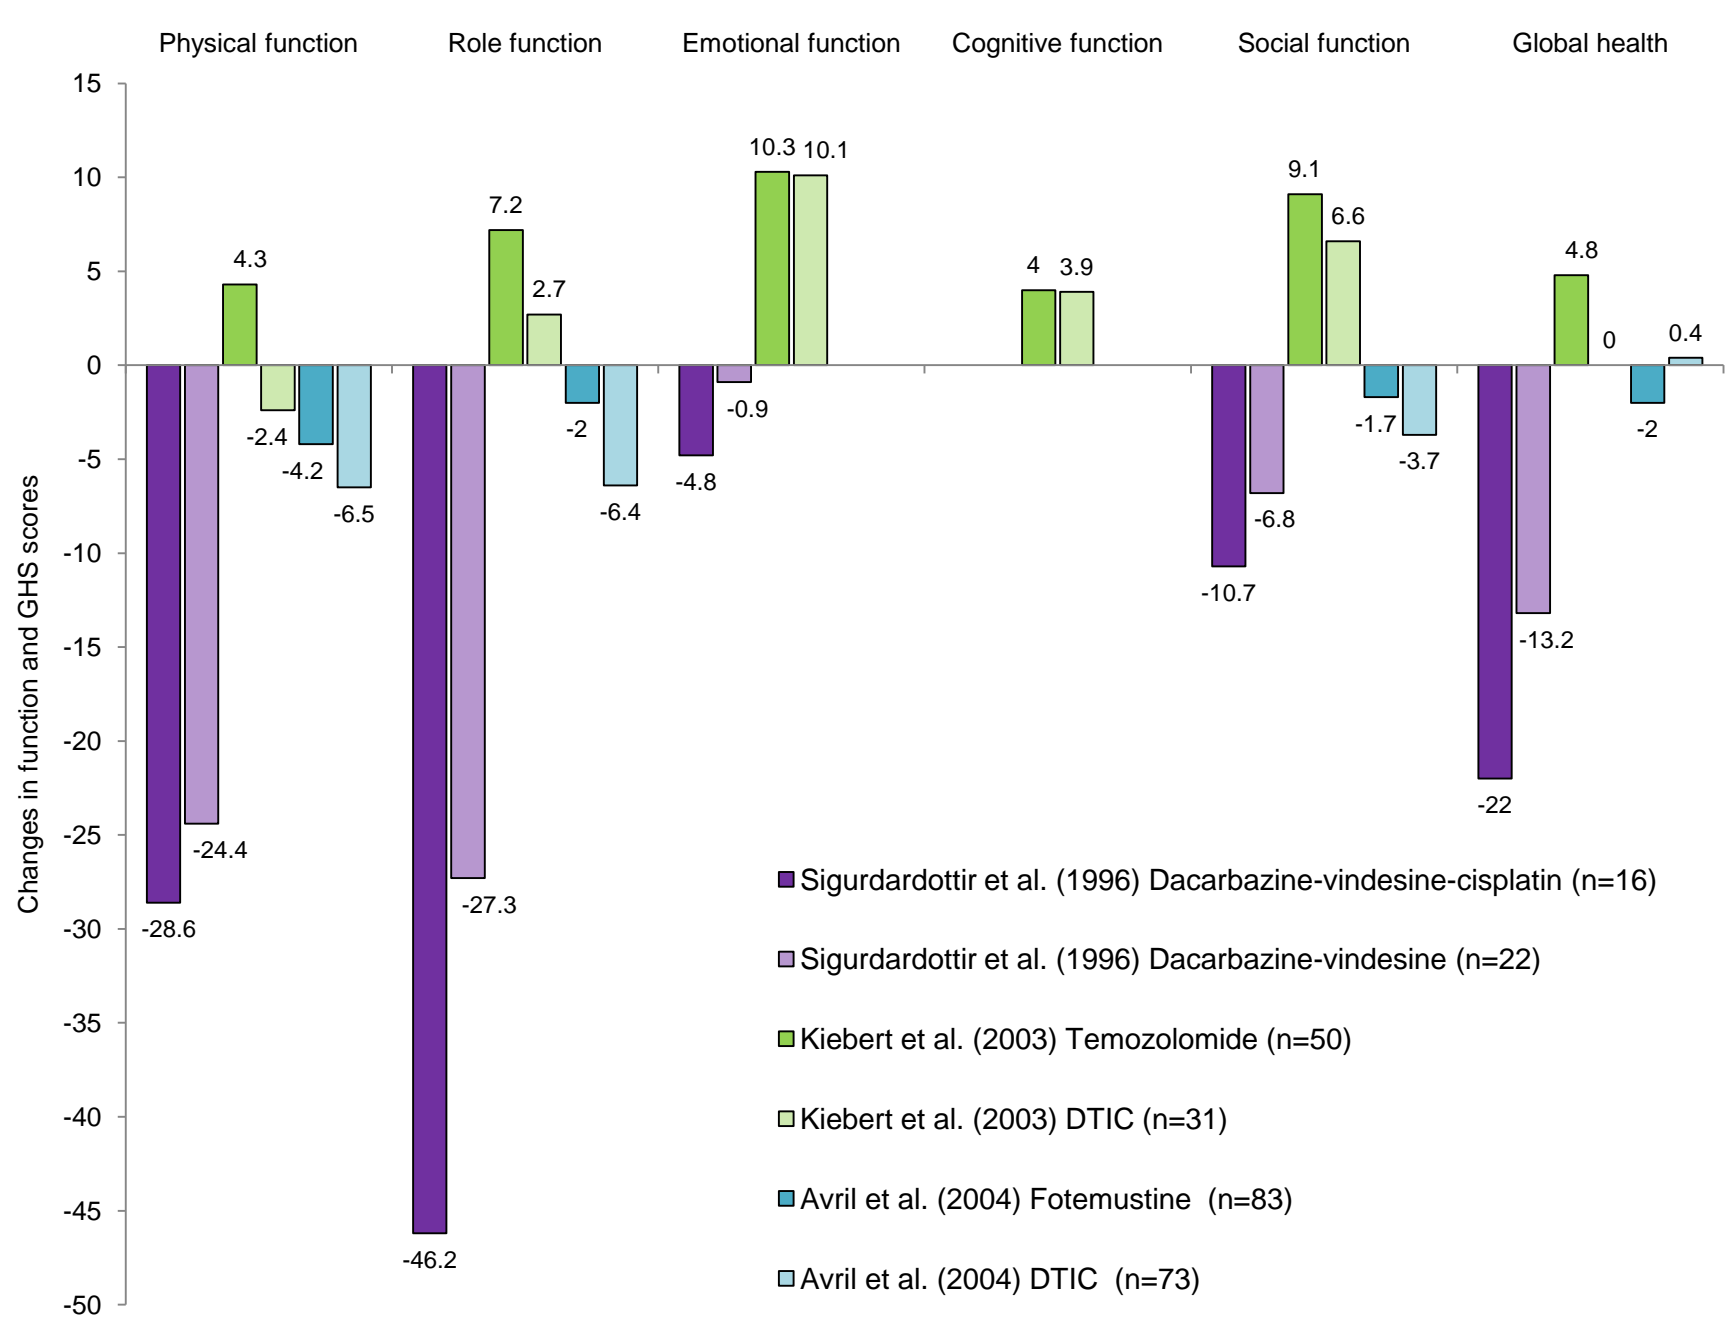

Supplement: MOESM2 [file 9558824]
